# Supplementary material for: Cytoplasmic hGle1A regulates stress granules by modulation of translation
Source: PubMed Central journal article supplement — Mol Biol Cell. 2015 Apr 15;26(8):1476–90. doi: 10.1091/mbc.E14-11-1523 (PMC4395128; doi:10.1091/mbc.e14-11-1523), 2015-04-15
Supplement: supp_E14-11-1523v1_CombinedSupMats.pdf [file supp_E14-11-1523v1_CombinedSupMats.pdf]

# Supplemental Materials

*Molecular Biology of the Cell*

Aditi et al.

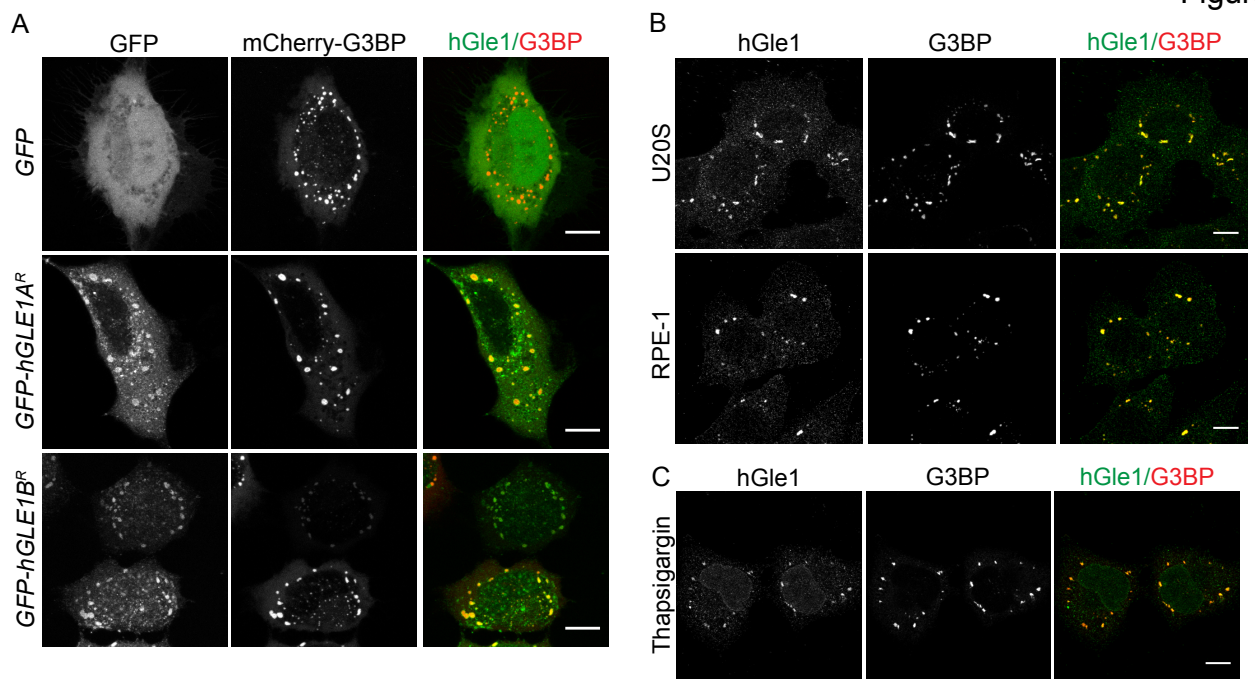

**Figure S1.** Endogenous hGle1 and exogenously expressed hGle1A and hGle1B are recruited to SGs upon stress. (A) Both hGle1A and hGle1B are recruited to SGs upon heat shock. Plasmids expressing EGFP, EGFP-hGle1A<sup>R</sup> or EGFP-hGle1B<sup>R</sup> and mCherry-G3BP proteins were co-expressed in HeLa cells. Cells were heat shocked at 45°C for 45 min and imaged live by confocal microscopy. Scale bar =10μm. (B) hGle1 localization in SGs is not cell type specific. U2OS and RPE-1 cells were heat shocked at 45°C for 60 min and processed for immunofluorescence using anti-hGle1 and G3BP antibodies. Scale bar =10μm. (C) hGle1 localization in SGs is not stress type specific. HeLa cells were treated with 10μM thapsigargin for 60 min at 37°C and processed for immunofluorescence using anti-hGle1 and G3BP antibodies. Scale bar =10μm.

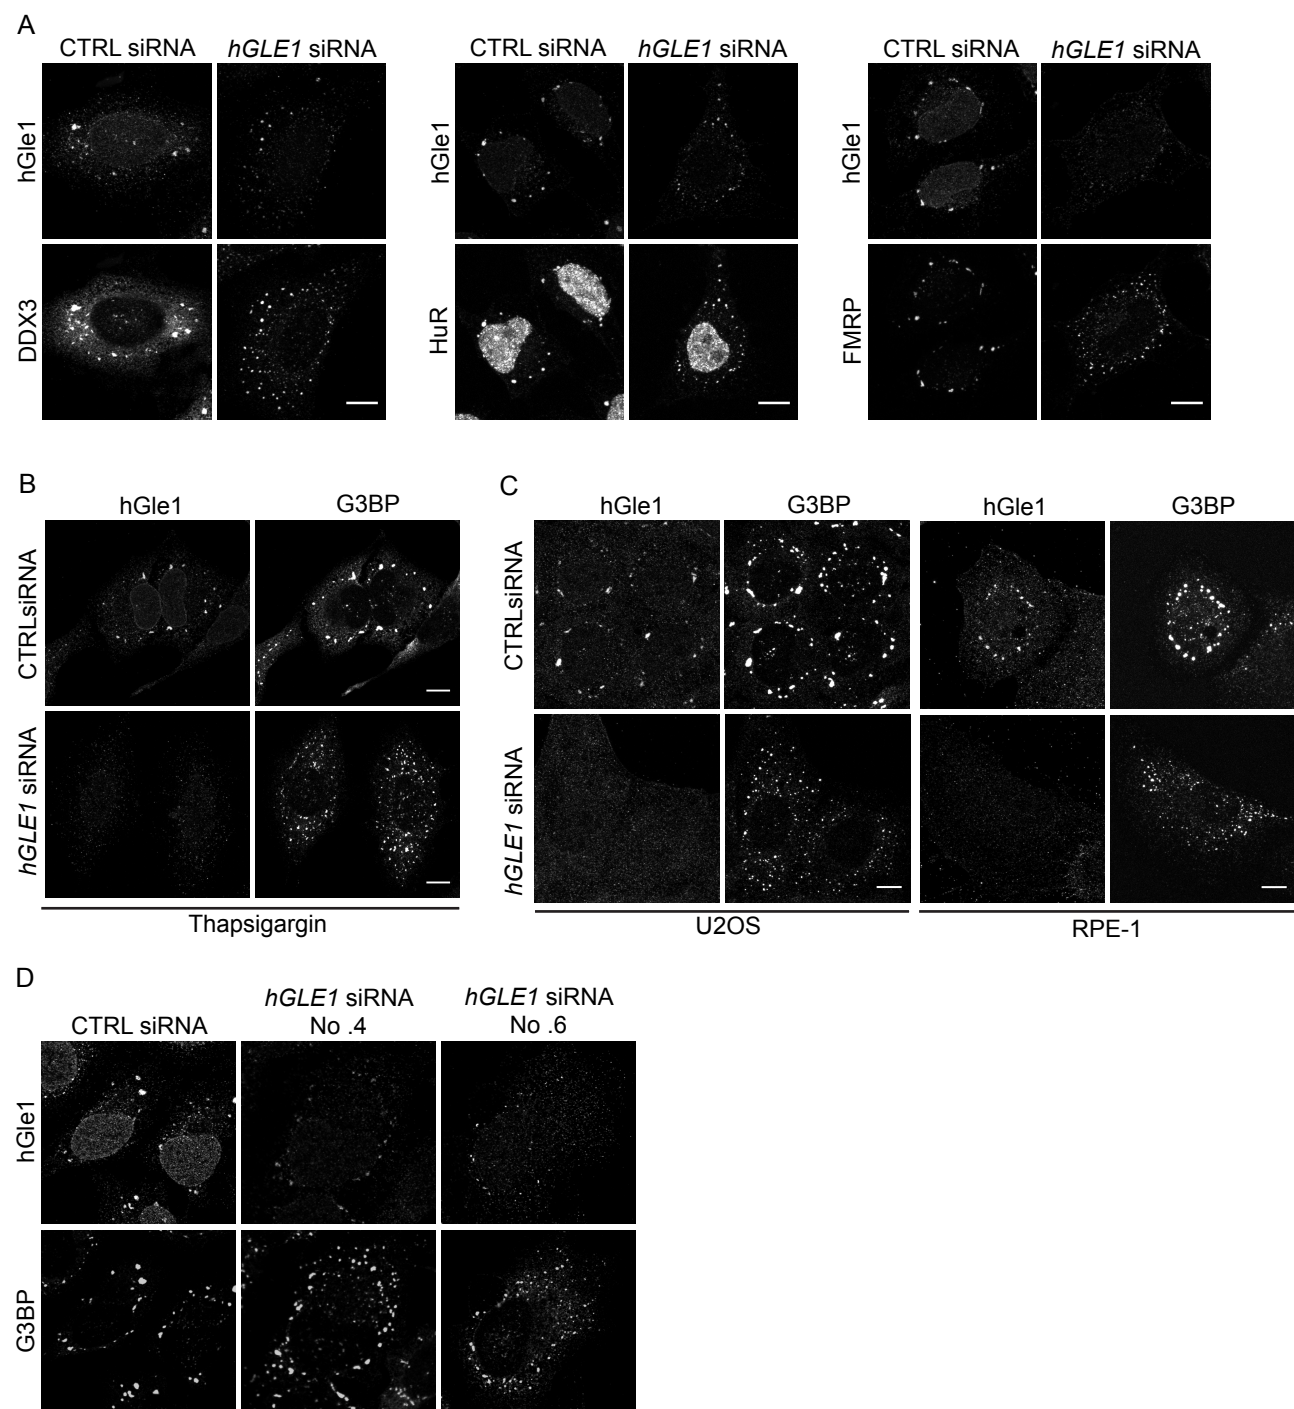

**Figure S2.** hGle1-dependent SG defects are not stress or cell type specific. (A) hGle1-dependent SG defects are not limited to G3BP. CTRL or *hGLE1* transfected HeLa cells were heat shocked at 45°C for 60 min and processed for immunofluorescence with anti-hGle1 and DDX3, HuR, or FMRP. Scale bar = 10µm. (B) hGle1-depleted cells exhibit SG defects in response to thapsigargin treatment. CTRL or *hGLE1* siRNA-treated HeLa cells were incubated with 10 µM thapsigargin for 60 min at 37°C. Following treatment, cells were processed for immunofluorescence using anti-hGle1 and G3BP antibodies. Scale bar = 10µm. (C) hGle1-dependent SG defects are not limited to HeLa cells. U2OS and RPE-1 cells were transfected with *hGLE1* and CTRL siRNAs. After 72 h siRNA transfection, cells were heat shocked at 45°C for 60 min and processed for immunofluorescence with anti-hGle1 and G3BP antibodies. Scale bar = 10µm. (D) SG defects in hGle1-depleted cells are not due to off targets effects of siRNAs. HeLa cells transfected with either CTRL, *hGLE1* siRNA No.4 or *hGLE1* siRNA No.6. Cells were heat shocked at 45°C for 60 min and processed for immunofluorescence with anti-hGle1 and G3BP antibodies. Scale bar = 10µm

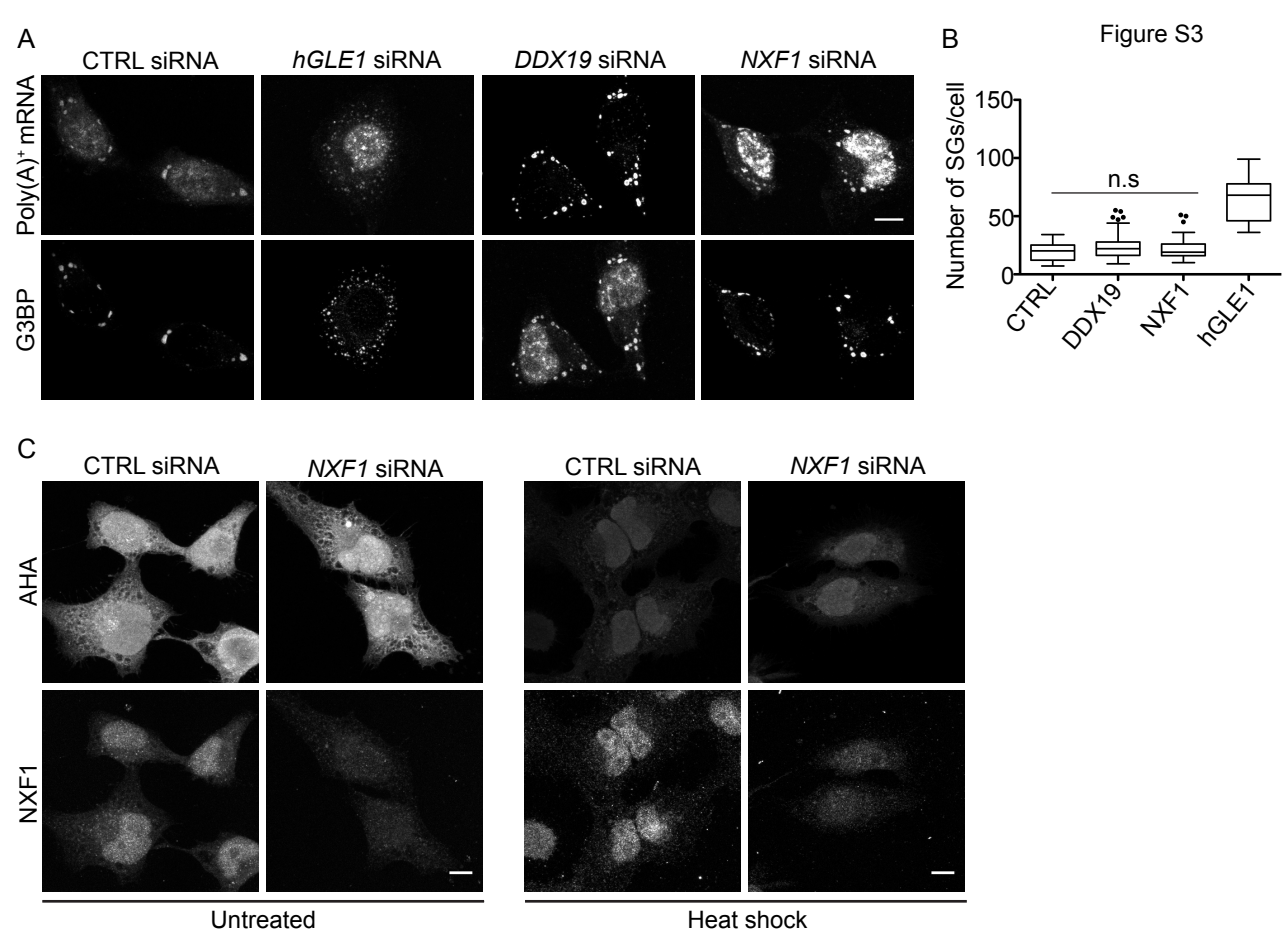

**Figure S3.** SG defects or translation defects in hGle1-depleted cells are not due to mRNA export defects. (A) HeLa cells were treated with CTRL, *hGLE1*, *NXF1*, or *DDX19B* siRNAs for 48 h. After siRNA treatments, cells were heat shocked at 45°C for 60 min and processed for immunofluorescence with anti-G3BP antibody followed by in situ hybridization using Cy3 oligo-dT probe. Scale bar =10µm. (B) *NXF1* knockdown does not cause deregulation in translation similar to hGle1-depleted cells. HeLa cells were transfected with either CTRL or *NXF1* siRNAs. Cells were either left untreated or heat shocked at 45°C for 15 min followed by metabolically labeling with AHA at either 37°C or 45°C for 30 min. After fixation, CTRL and *NXF1* siRNA-treated cells were processed for detection of AHA-labeled proteins using Alkyne-488 followed by immunofluorescence with anti- *NXF1* antibodies. Scale bar =10µm.

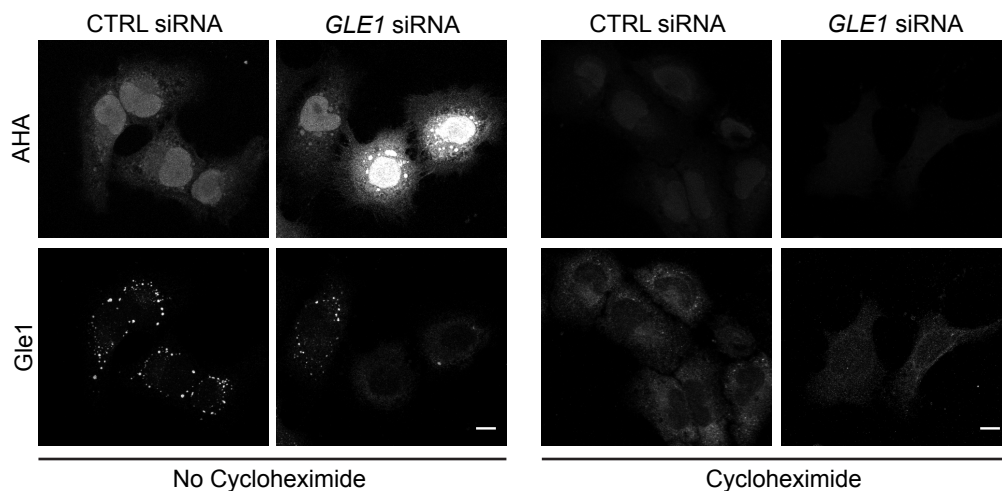

**Figure S4.** AHA incorporation in hGle1-depleted cells is due to nascent protein synthesis. HeLa cells were transfected with either CTRL or hGLE1 siRNAs. Cycloheximide was added to cells and cells were heat shocked at 45°C for 15 min followed by metabolically labeling with AHA for 30 min at 45°C. After fixation, hGLE1 and CTRL siRNA-treated cells were processed for detection of AHA –labeled proteins using Alkyne-488 followed by immunofluorescence with anti-hGle1 antibodies. Scale bar =10µm.

Figure S5

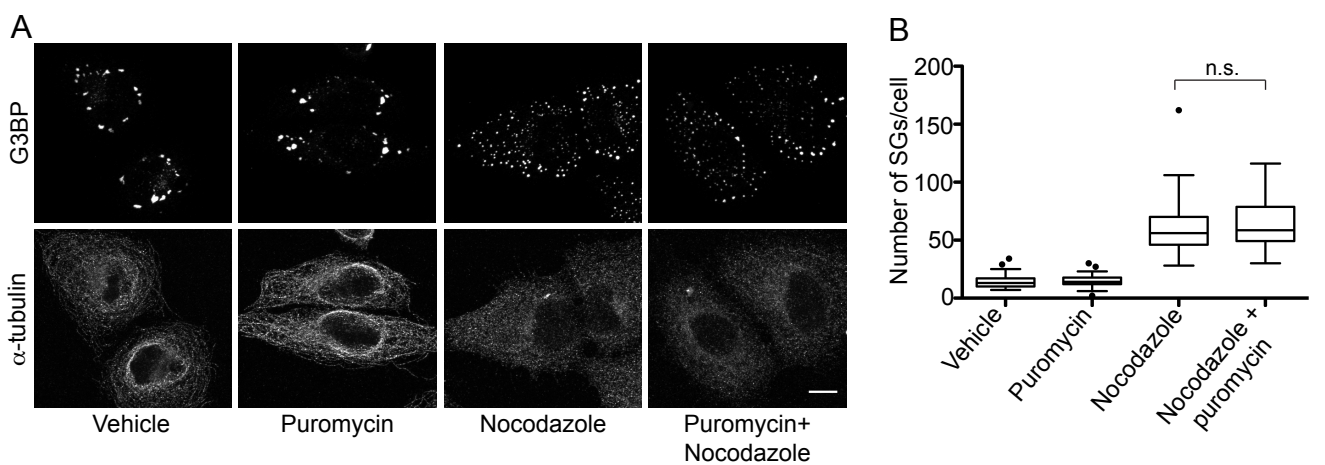

**Figure S5.** Puromycin does not rescue microtubule-dependent SG defects. (A-B) HeLa cells were pre-incubated with 5  $\mu$ M nocodazole for 120 min at 37°C. Cells were treated with vehicle alone, 0.5 mg/ml puromycin, 5  $\mu$ M nocodazole, or 0.5 mg/ml puromycin and 5  $\mu$ M nocodazole for 60 min at 45°C. Cells were processed for immunofluorescence using anti  $\alpha$ -tubulin and G3BP antibodies. Scale bar =10 $\mu$ m.

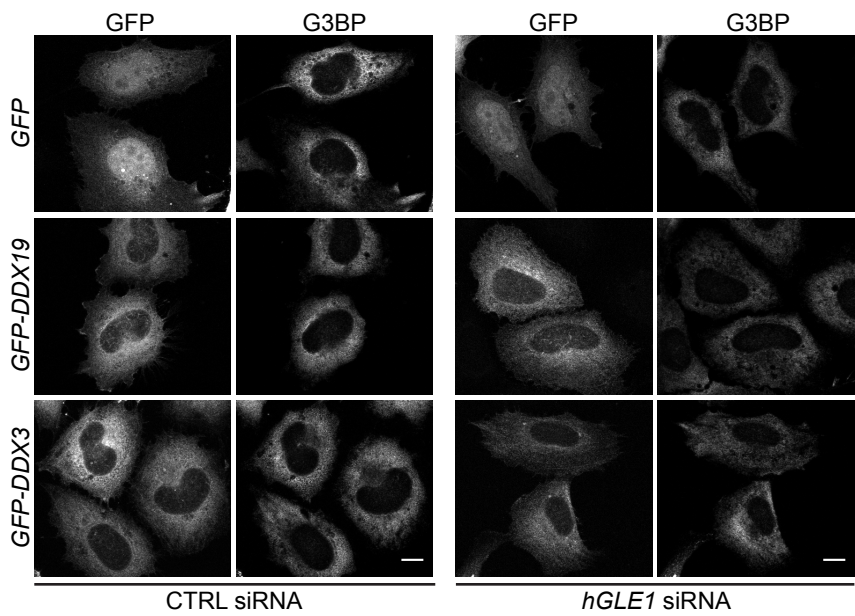

**Figure S6.** Expression of DDX3 in hGle1-depleted cells under non-stress conditions. CTRL or *hGLE1* siRNA-treated cells were transfected with *EGFP*, *EGFP-DDX19B*, or *DDX3-EGFP* plasmids. Cells were processed for immunofluorescence detection of G3BP and hGle1. Scale bar =10µm.
